# Supplementary material for: A Fecal-Microbial-Extracellular-Vesicles-Based Metabolomics Machine Learning Framework and Biomarker Discovery for Predicting Colorectal Cancer Patients
Source: MDPI journal article supplement (doi:10.3390/metabo13050589), 2023-04-25
Supplement: s1 [file s1]

**Table S1.** The metadata of the analyzed metabolites as extracted from the original study by Kim et al.

| <a href="#">Metabolite Name</a> | <a href="#">RefMet Name/Standardized Name*</a> | <a href="#">WorkBench Metabolite ID</a> | <a href="#">Retention time / index</a> | <a href="#">m/z ratio</a> | <a href="#">Level of MSI</a> | <a href="#">Exact mass molecule</a> | <a href="#">Similarity</a> | <a href="#">Reverse</a> | <a href="#">Probability</a> | <a href="#">Chemical Formula</a> |
|---------------------------------|------------------------------------------------|-----------------------------------------|----------------------------------------|---------------------------|------------------------------|-------------------------------------|----------------------------|-------------------------|-----------------------------|----------------------------------|
| Alanine                         | <a href="#">Alanine</a>                        | <a href="#">ME305315</a>                | 291.15                                 | 116                       | 2                            | 89.0932                             | 848                        | 848                     | 6235                        | C3H7NO2                          |
| Aminoisobutyric acid            | <a href="#">Aminoisobutyric acid</a>           | <a href="#">ME305316</a>                | 444.25                                 | 174                       | 2                            | 103.1198                            | 834                        | 845                     | 6732                        | C4H9NO2                          |
| Butanoic acid                   | <a href="#">Butyric acid</a>                   | <a href="#">ME305317</a>                | 320                                    | 145                       | 2                            | 88.1051                             | 851                        | 870                     | 3894                        | C4H8O2                           |
| Ethanolamine                    | <a href="#">Ethanolamine</a>                   | <a href="#">ME305318</a>                | 365.25                                 | 174                       | 2                            | 61.0831                             | 742                        | 866                     | 4353                        | C2H7NO                           |
| Furoic acid                     | <a href="#">2-Furoic acid</a>                  | <a href="#">ME305319</a>                | 306.2                                  | 189                       | 2                            | 112.0835                            | 737                        | 858                     | 6264                        | C5H4O3                           |
| Hexanoic acid                   | <a href="#">Caproic acid</a>                   | <a href="#">ME305320</a>                | 275.8                                  | 173                       | 2                            | 116.1583                            | 861                        | 878                     | 9200                        | C6H12O2                          |
| Isoleucine                      | <a href="#">Isoleucine</a>                     | <a href="#">ME305321</a>                | 325.2                                  | 86                        | 2                            | 131.1729                            | 737                        | 739                     | 6213                        | C6H13NO2                         |
| Leucine                         | <a href="#">Leucine</a>                        | <a href="#">ME305322</a>                | 315.15                                 | 86                        | 2                            | 131.1729                            | 777                        | 845                     | 6243                        | C6H13NO2                         |
| Lysine                          | <a href="#">Lysine</a>                         | <a href="#">ME305323</a>                | 599.65                                 | 174                       | 2                            | 146.19                              | 712                        | 717                     | 6382                        | C6H14N2O2                        |
| Oleic acid                      | <a href="#">Oleic acid</a>                     | <a href="#">ME305324</a>                | 679.35                                 | 129                       | 2                            | 282.4614                            | 723                        | 725                     | 6091                        | C18H34O2                         |
| Oxalic acid                     | <a href="#">Oxalic acid</a>                    | <a href="#">ME305325</a>                | 506.55                                 | 116                       | 2                            | 90.0349                             | 709                        | 854                     | 4350                        | C2H2O4                           |
| Palmitic acid                   | <a href="#">Palmitic acid</a>                  | <a href="#">ME305326</a>                | 631.8                                  | 117                       | 2                            | 256.4241                            | 899                        | 899                     | 6134                        | C16H32O2                         |
| Phenol                          | <a href="#">Phenol</a>                         | <a href="#">ME305327</a>                | 953.35                                 | 441                       | 2                            | 94.1112                             | 774                        | 774                     | 9579                        | C6H6O                            |
| Succinic acid                   | <a href="#">Succinic acid</a>                  | <a href="#">ME305328</a>                | 453.35                                 | 233                       | 2                            | 118.088                             | 876                        | 896                     | 4964                        | C4H6O4                           |
| Tyramine                        | <a href="#">Tyramine</a>                       | <a href="#">ME305329</a>                | 745.25                                 | 174                       | 2                            | 137.179                             | 877                        | 889                     | 4563                        | C8H11NO                          |

**Table S2.** The performance measurements of the permutation test for Leucine and Oxalic acid that has been conducted by Kim et al.

| Amino Acid  | Parameter | p-value | Training set |             |          |                           | Test set    |             |          |                           |
|-------------|-----------|---------|--------------|-------------|----------|---------------------------|-------------|-------------|----------|---------------------------|
|             |           |         | Sensitivity  | Specificity | Accuracy | AUC                       | Sensitivity | Specificity | Accuracy | AUC                       |
| Leucine     | 0.0000005 | 0.000   | 0.86         | 0.94        | 0.91     | 0.94<br>(CI: 0.92 - 0.96) | 0.80        | 1.00        | 0.87     | 0.92<br>(CI: 0.84 - 1.00) |
| Oxalic acid | 0.0000047 | 0.000   |              |             |          |                           |             |             |          |                           |
